# Supplementary material for: Gold-Catalyzed Addition of β-Ketoesters to Alkenes: Influence of Electronic and Steric Effects in the Reaction Outcome
Source: MDPI journal article supplement (doi:10.3390/molecules23030629), 2018-03-10
Supplement: s1 [file s1]

**Supplementary Materials: Gold-catalyzed addition of  $\beta$ -ketoesters to alkenes. Influence of electronic and steric effects in the reaction outcome.**

Agustina La-Venia, Mirta P. Mischne, and Ernesto G. Mata

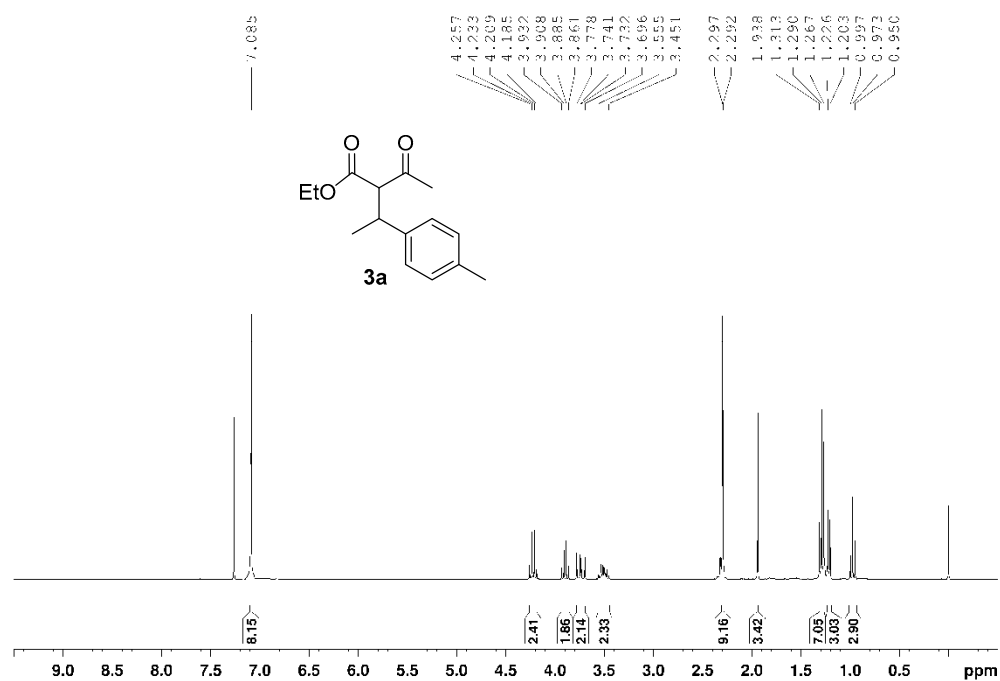

Figure S1. <sup>1</sup>H NMR of compound **3a** in CDCl<sub>3</sub>.

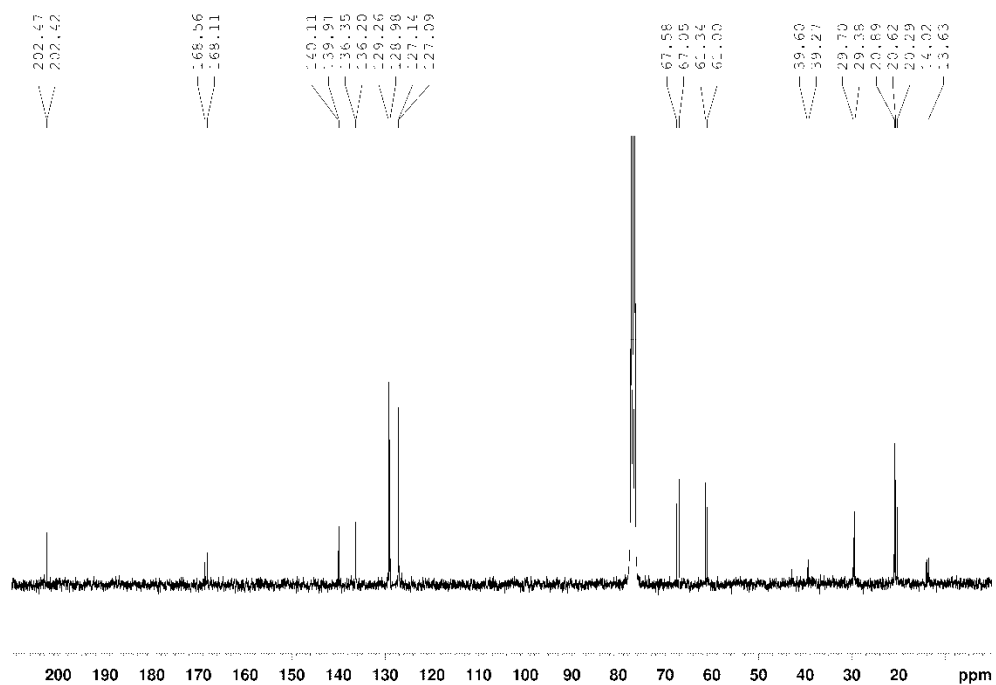

Figure S2. <sup>13</sup>C NMR of compound **3a** in CDCl<sub>3</sub>.

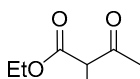

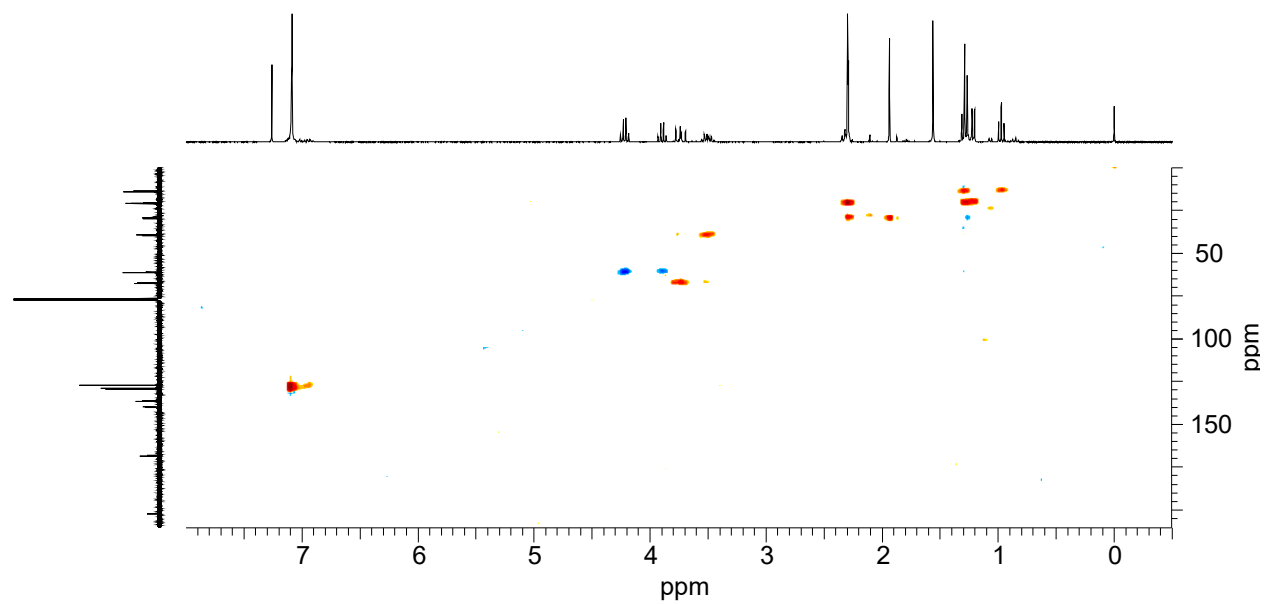

**Figure S3.** HSQC NMR of compound **3a** in  $\text{CDCl}_3$ .

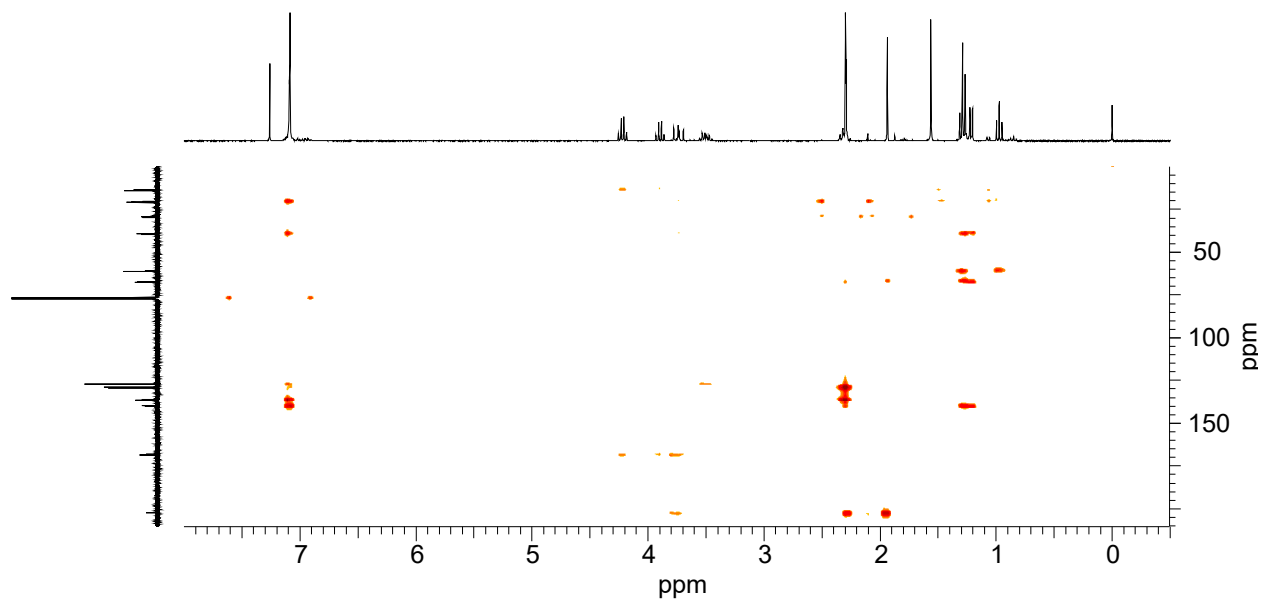

**Figure S4.** HMBC NMR of compound **3a** in  $\text{CDCl}_3$ .

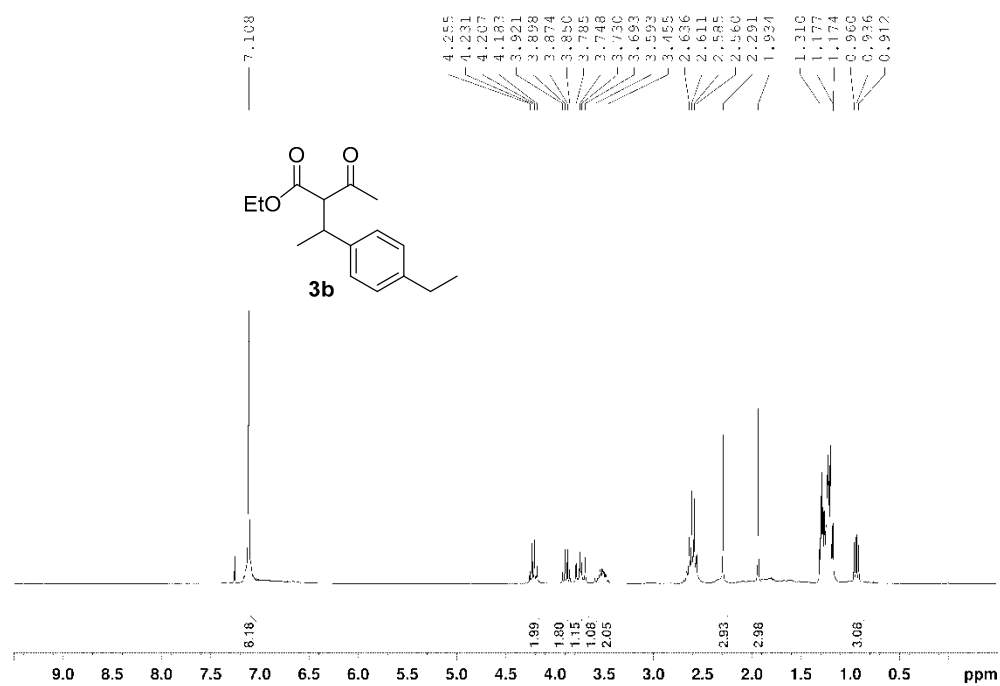

Figure S5. <sup>1</sup>H NMR of compound **3b** in CDCl<sub>3</sub>.

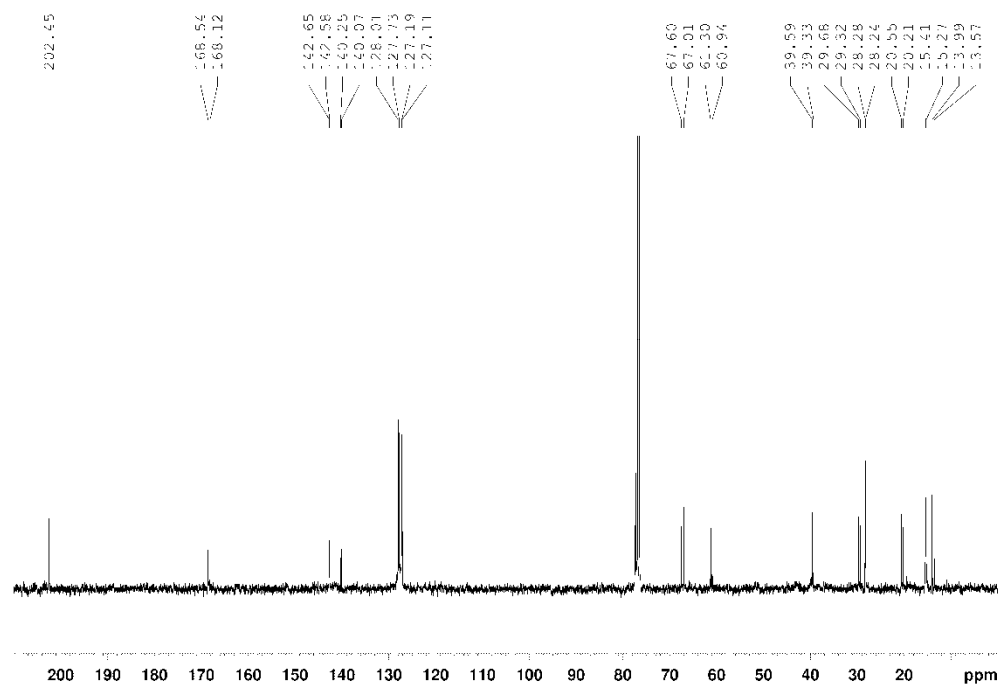

Figure S6. <sup>13</sup>C NMR of compound **3b** in CDCl<sub>3</sub>.

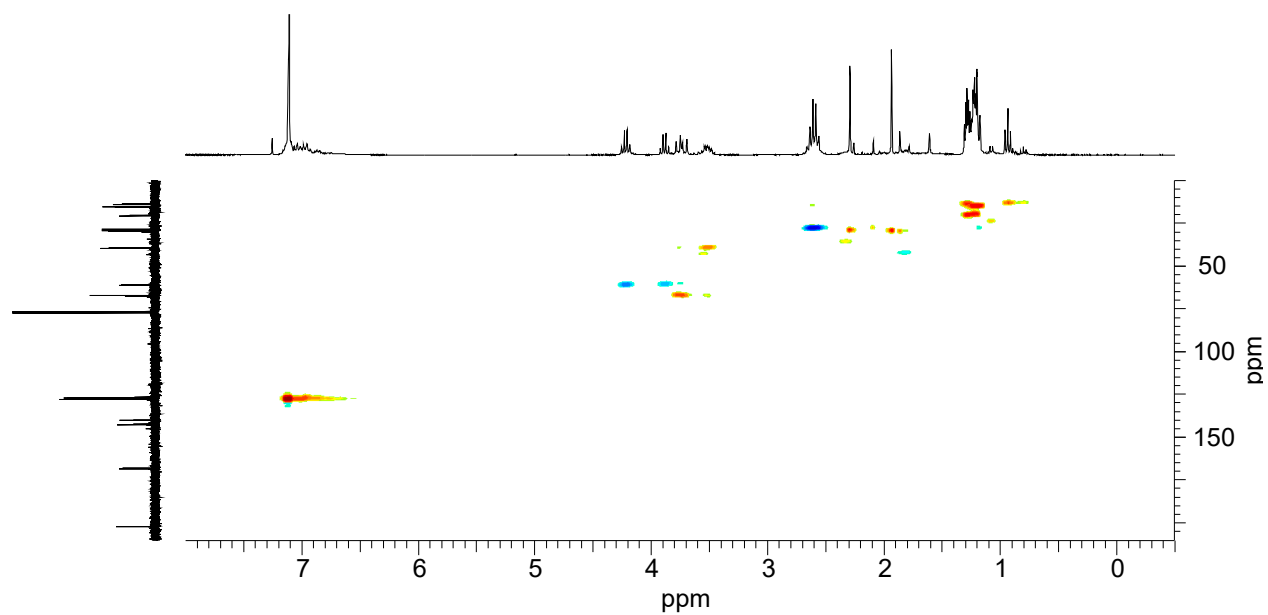

**Figure S7.** HSQC NMR of compound **3b** in  $\text{CDCl}_3$ .

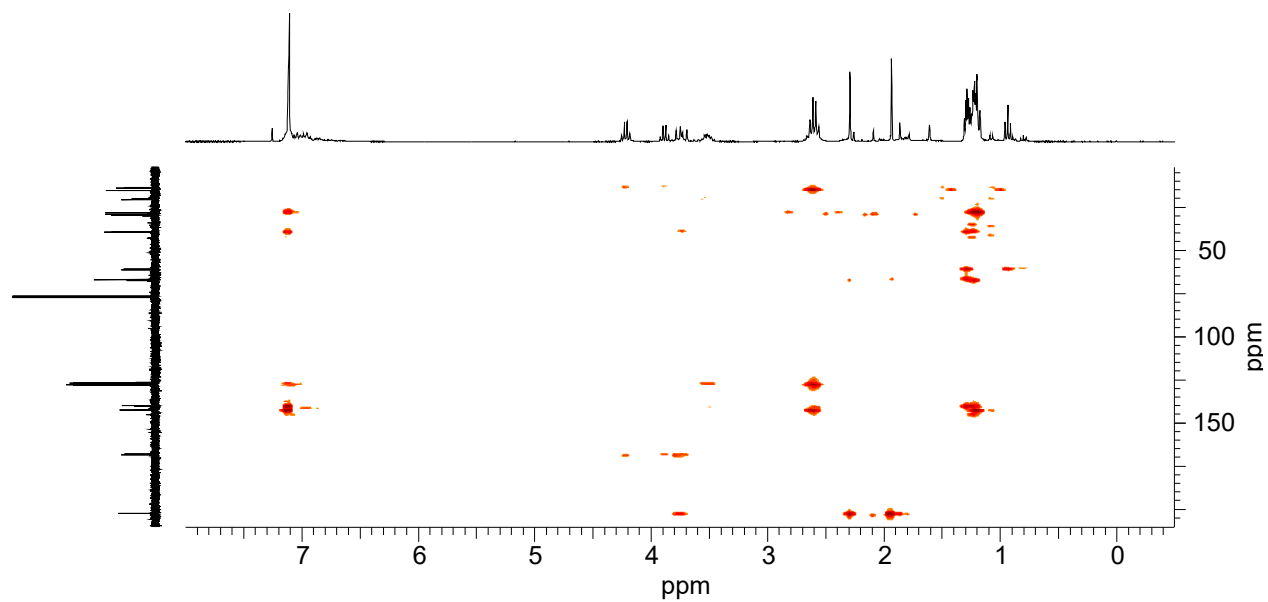

**Figure S8.** HMBC NMR of compound **3b** in  $\text{CDCl}_3$ .

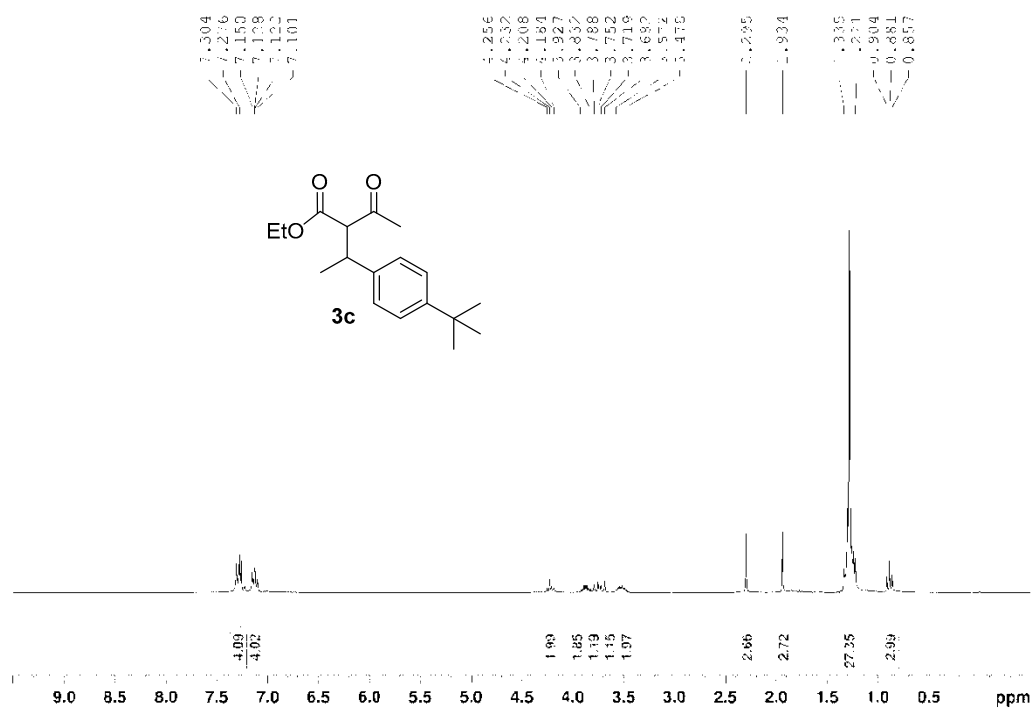

Figure S9. <sup>1</sup>H NMR of compound **3c** in CDCl<sub>3</sub>.

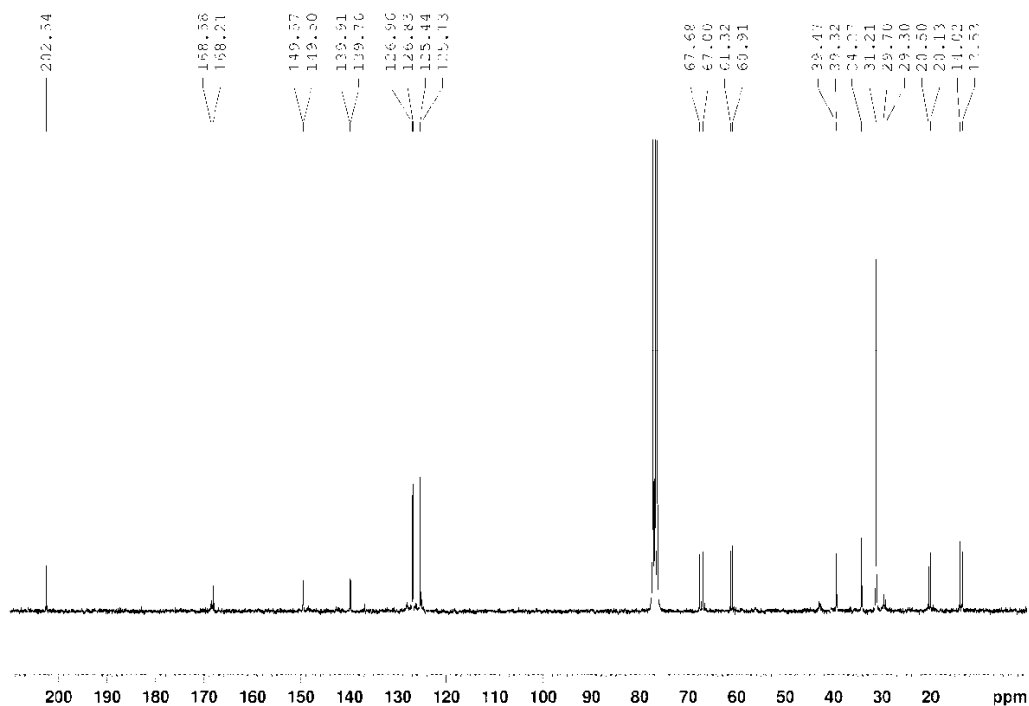

Figure S10. <sup>13</sup>C NMR of compound **3c** in CDCl<sub>3</sub>.

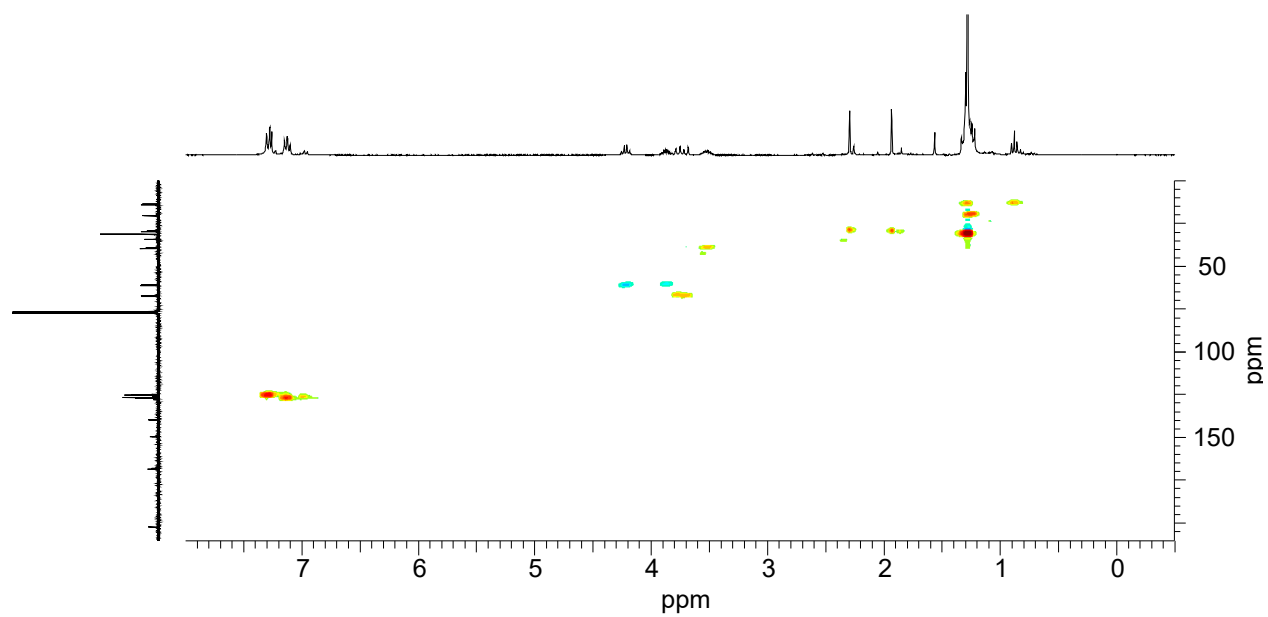

**Figure S11.** HSQC NMR of compound **3c** in CDCl<sub>3</sub>.

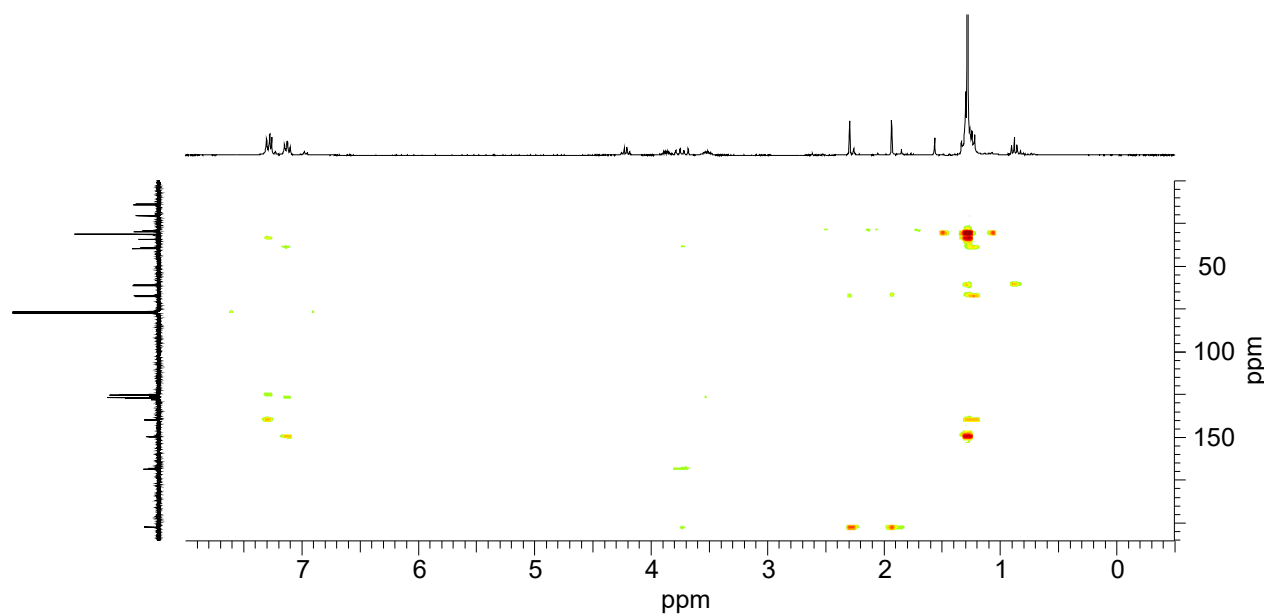

**Figure S12.** HMBC NMR of compound **3c** in CDCl<sub>3</sub>.

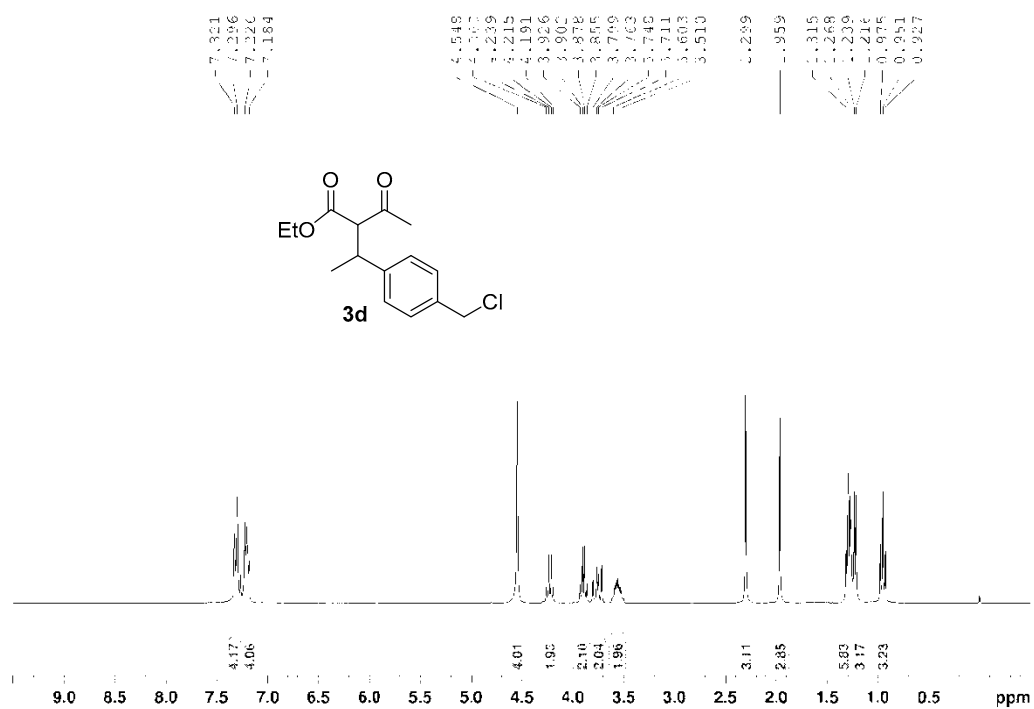

Figure S13. <sup>1</sup>H NMR of compound **3d** in CDCl<sub>3</sub>.

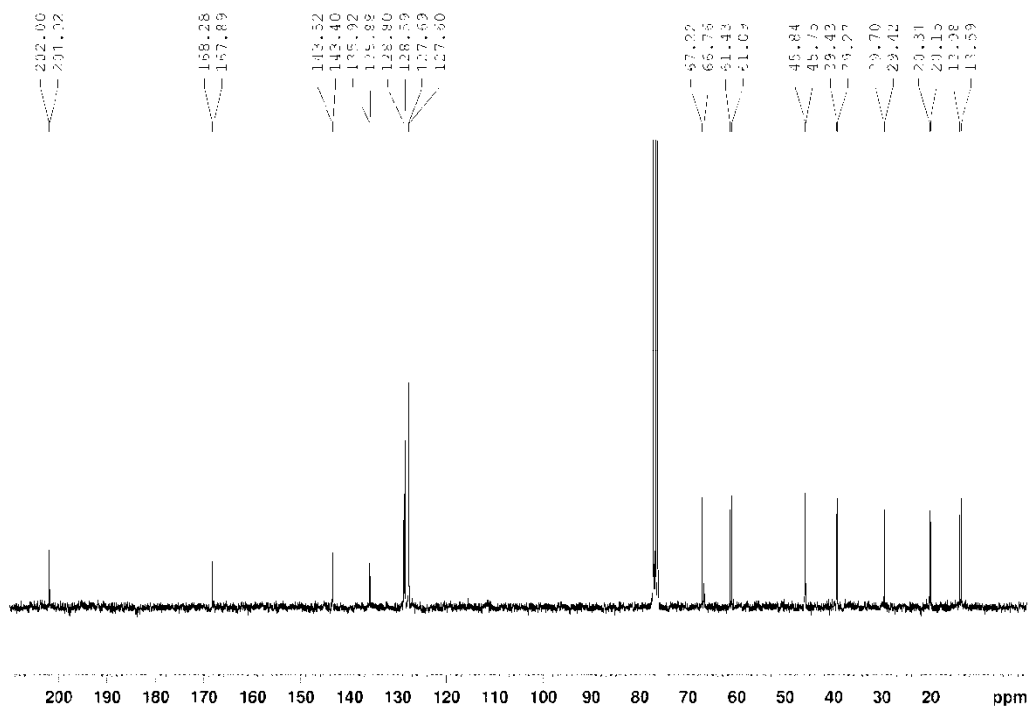

Figure S14. <sup>13</sup>C NMR of compound **3d** in CDCl<sub>3</sub>.



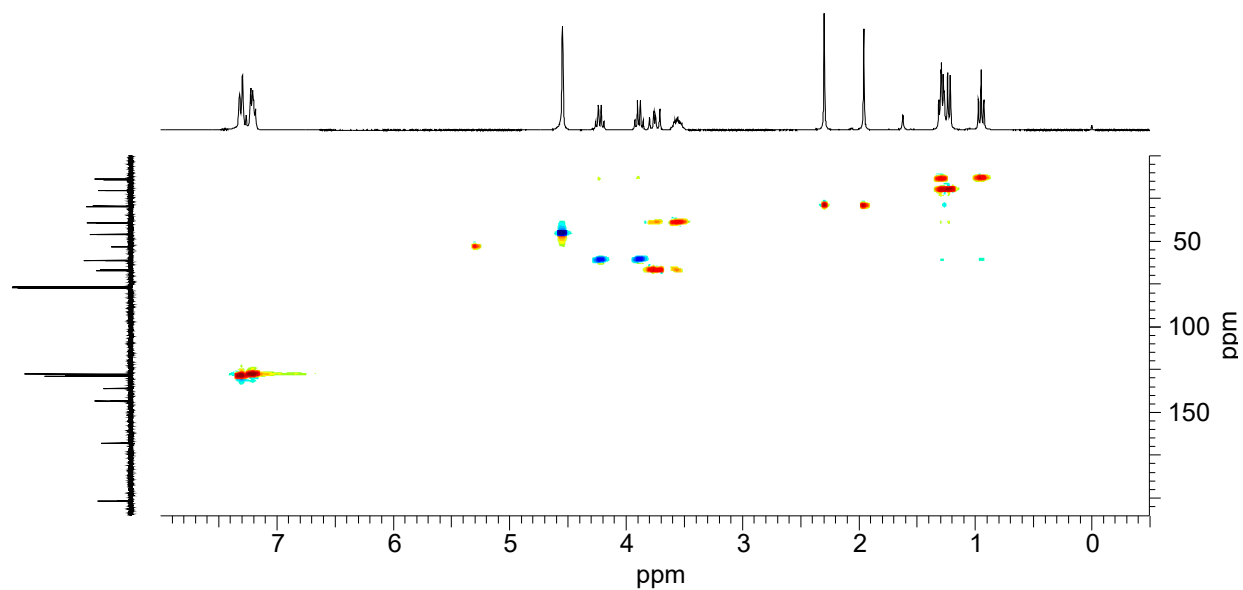

**Figure S15.** HSQC NMR of compound **3d** in CDCl<sub>3</sub>.

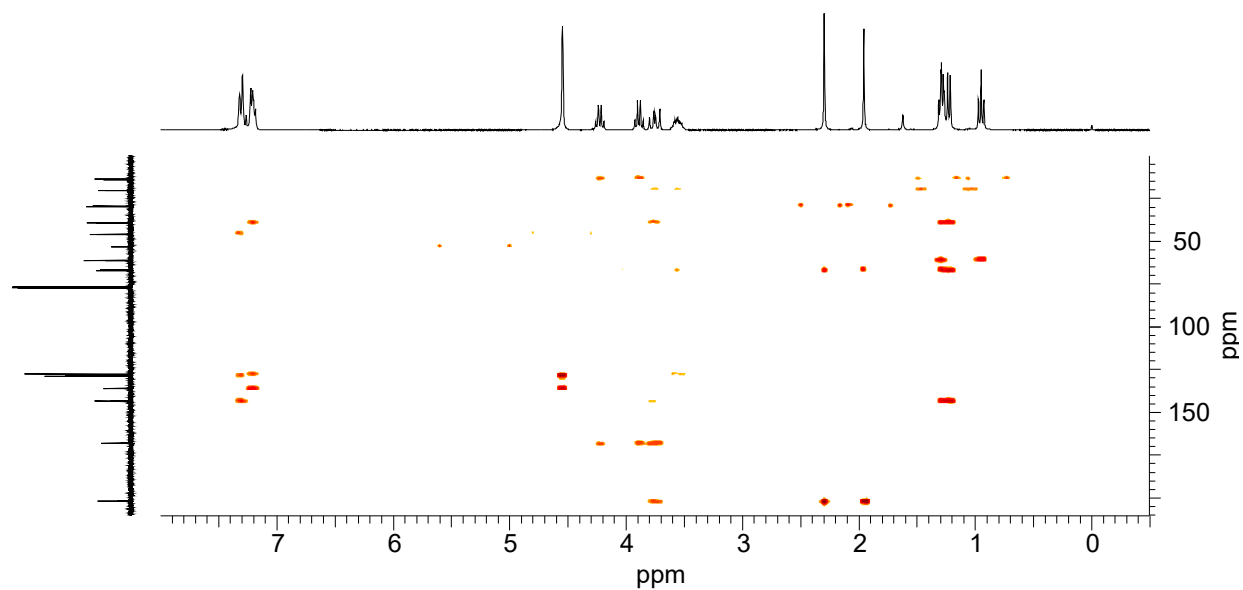

**Figure S16.** HMBC NMR of compound **3d** in CDCl<sub>3</sub>.

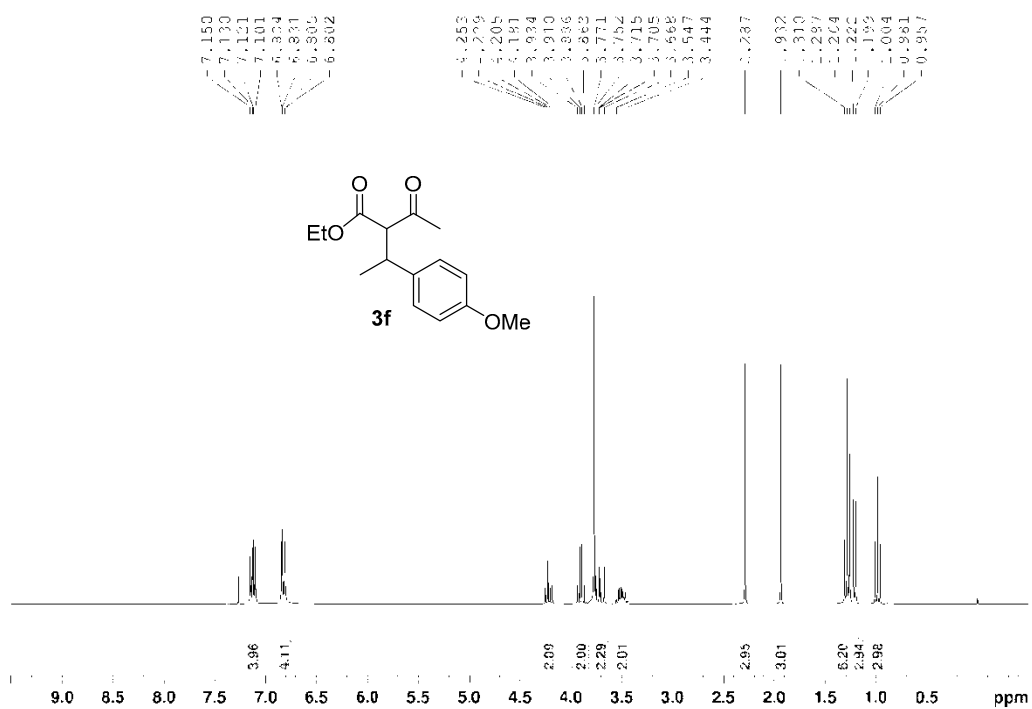

Figure S17. <sup>1</sup>H NMR of compound **3f** in CDCl<sub>3</sub>.

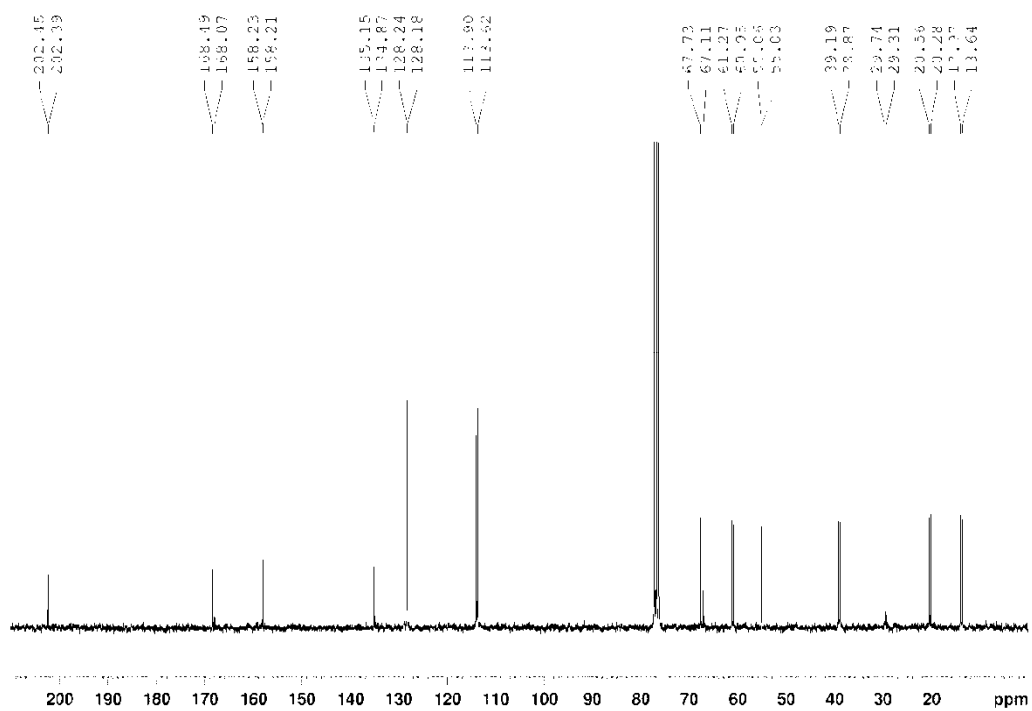

Figure S18. <sup>13</sup>C NMR of compound **3f** in CDCl<sub>3</sub>.

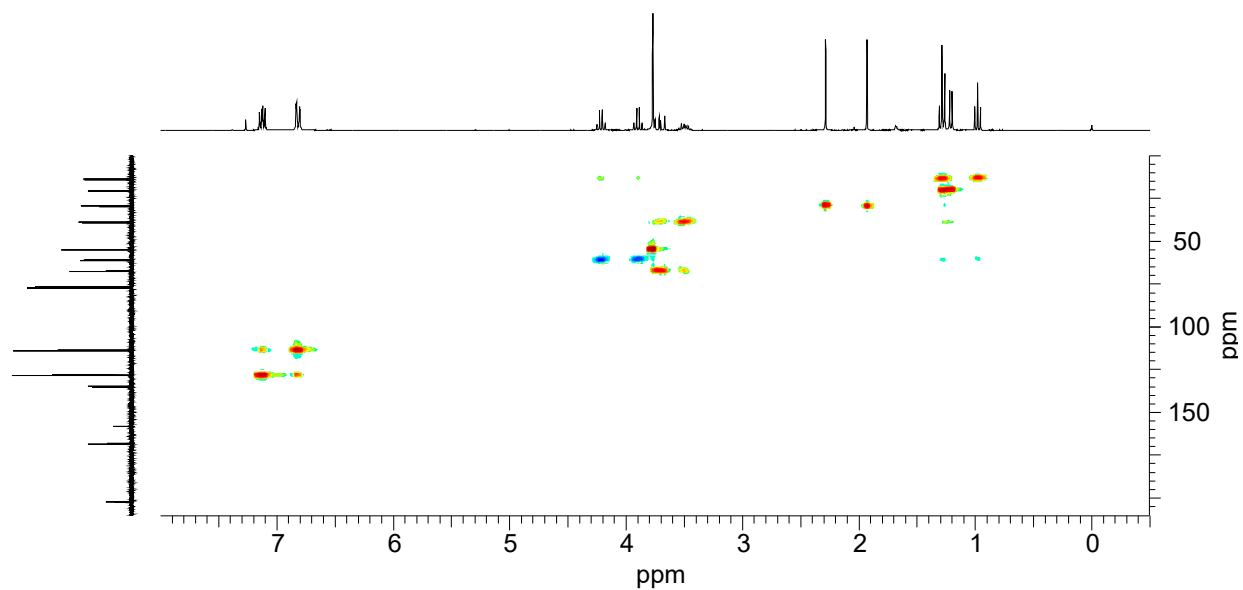

**Figure S19.** HSQC NMR of compound **3f** in  $\text{CDCl}_3$ .

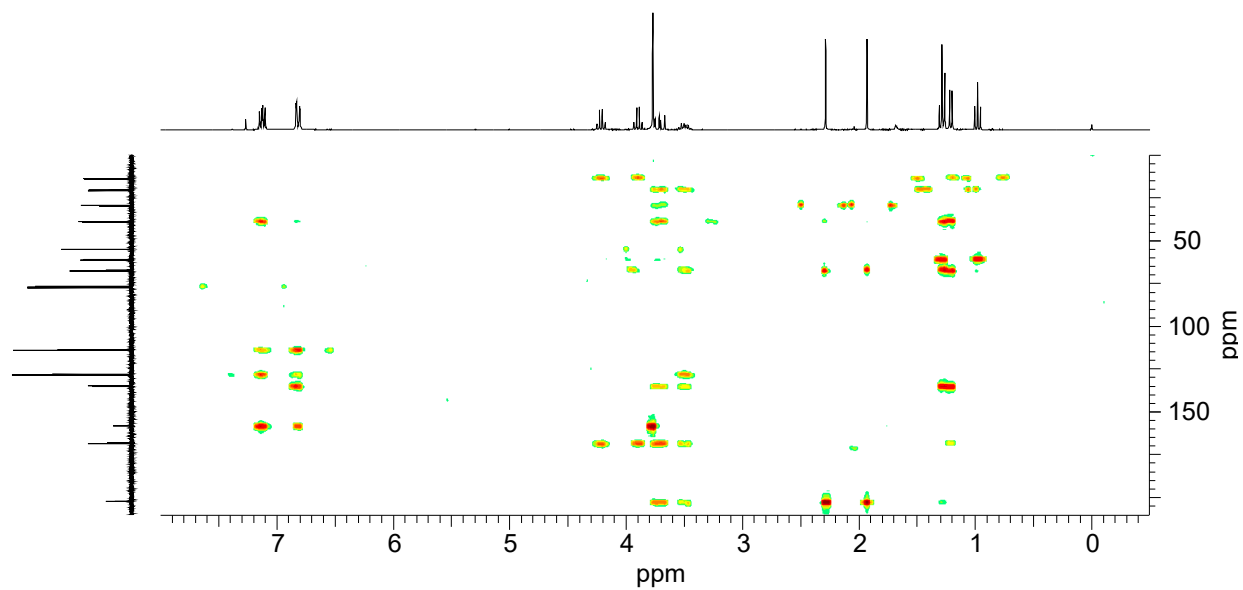

**Figure S20.** HMBC NMR of compound **3f** in  $\text{CDCl}_3$ .
